# Supplementary material
Source: publisher figshare collection journal article supplement (https://gsajournals.figshare.com/ndownloader/files/15051539)
Supplement: Supplementary file 1 [file 15051539]

## Sheet: Table S3
Table S3. Enriched GO terms identified in overrepresented genes in cisplatin-treated versus vehicle-treated tg melanoma medaka.
Database	Name	ID	fold enrichment; p-val
biological process	melanosome organization	GO:0032438	O=3;E=0.02;R=172.12;rawP=5.88e-07
	anterograde synaptic vesicle transport	GO:0048490	O=3;E=0.02;R=195.07;rawP=3.94e-07
	pigment granule organization	GO:0048753	O=3;E=0.02;R=162.56;rawP=7.05e-07
	anterograde axon cargo transport	GO:0008089	O=3;E=0.02;R=127.22;rawP=1.53e-06
	cellular pigmentation	GO:0033059	O=3;E=0.03;R=88.67;rawP=4.67e-06
	axon cargo transport	GO:0008088	O=3;E=0.04;R=83.60;rawP=5.60e-06
	cytoskeleton-dependent intracellular transport	GO:0030705	O=3;E=0.07;R=44.33;rawP=3.84e-05
	microtubule-based transport	GO:0010970	O=3;E=0.06;R=47.97;rawP=3.03e-05
	synaptic vesicle transport	GO:0048489	O=3;E=0.07;R=43.03;rawP=4.20e-05
	post-Golgi vesicle-mediated transport	GO:0006892	O=3;E=0.08;R=39.54;rawP=5.41e-05
cellular component	BLOC-1 complex	GO:0031083	O=3;E=0.01;R=207.12;rawP=3.33e-07
	BLOC complex	GO:0031082	O=3;E=0.01;R=207.12;rawP=3.33e-07
	anchored to membrane	GO:0031225	O=3;E=0.16;R=18.70;rawP=0.0005
	cytosolic part	GO:0044445	O=3;E=0.21;R=14.40;rawP=0.0011
	vacuolar membrane	GO:0005774	O=2;E=0.21;R=9.76;rawP=0.0176
	intrinsic to membrane	GO:0031224	O=10;E=6.06;R=1.65;rawP=0.0486
	plasma membrane	GO:0005886	O=9;E=4.78;R=1.88;rawP=0.0298
	cell periphery	GO:0071944	O=9;E=4.88;R=1.85;rawP=0.0337
	intrinsic to plasma membrane	GO:0031226	O=4;E=1.41;R=2.84;rawP=0.0475
	vacuolar part	GO:0044437	O=2;E=0.28;R=7.10;rawP=0.0318
molecular function	alkaline phosphatase activity	GO:0004035	O=3;E=0.01;R=477.63;rawP=1.88e-08
	metallocarboxypeptidase activity	GO:0004181	O=2;E=0.03;R=79.60;rawP=0.0003
	secondary active transmembrane transporter activity	GO:0015291	O=3;E=0.20;R=14.93;rawP=0.0010
	metalloexopeptidase activity	GO:0008235	O=2;E=0.04;R=50.28;rawP=0.0007
	carboxypeptidase activity	GO:0004180	O=2;E=0.05;R=44.43;rawP=0.0009
	amino acid transmembrane transporter activity	GO:0015171	O=2;E=0.07;R=27.69;rawP=0.0023
	anion transmembrane transporter activity	GO:0008509	O=3;E=0.26;R=11.60;rawP=0.0020
	phosphatase activity	GO:0016791	O=3;E=0.27;R=10.94;rawP=0.0024
	solute:cation symporter activity	GO:0015294	O=2;E=0.09;R=23.30;rawP=0.0032
	active transmembrane transporter activity	GO:0022804	O=3;E=0.32;R=9.27;rawP=0.0038
